# Supplementary material for: Detoxified Spent Pot Lining from Aluminum Production as (Alumino-)Silicate Source for Composite Cement and AutoClaved Aerated Concrete
Source: MDPI journal article supplement (doi:10.3390/app11083715), 2021-04-20
Supplement: s1 [file s1]

Archive with 1 entries (1 files):
- applsci-1185940-supplementary.pdf
