# Supplementary material for: Detoxified Spent Pot Lining from Aluminum Production as (Alumino-)Silicate Source for Composite Cement and AutoClaved Aerated Concrete
Source: MDPI journal article supplement (doi:10.3390/app11083715), 2021-04-20
Supplement: s1 [file s1 › applsci-1185940-supplementary.pdf]

# Detoxified spent pot lining as (alumino)silicate source for composite cement and autoclaved aerated concrete

Arne Peys, Mateja Košir, Ruben Snellings, Ana Mladenovič, Liesbeth Horckmans

## Supplementary information

The X-ray diffractograms of the cement pastes are provided in this document. Figure S1 compares the hydration products of the quartz filler and SPL containing pastes at 7 and 28 days. The hydrate phase assemblage is the same for both samples. The full diffractograms are provided in Figure S2 for completeness and transparency.

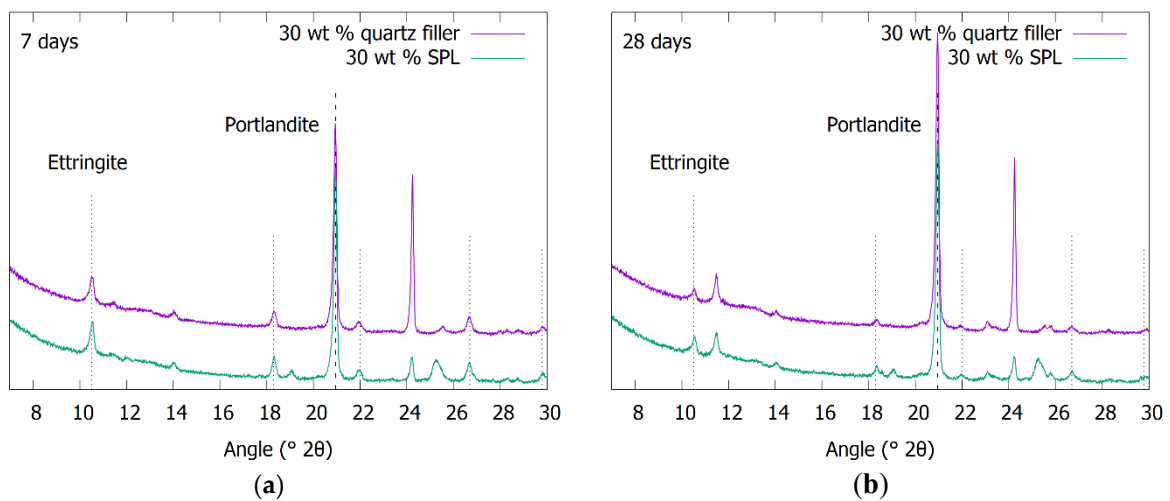

**Figure S1.** Comparison of the diffractograms of cement pastes with 30 wt% spent pot lining aluminosilicates and 30 wt% of quartz filler at (a) 7 and (b) 28 days.

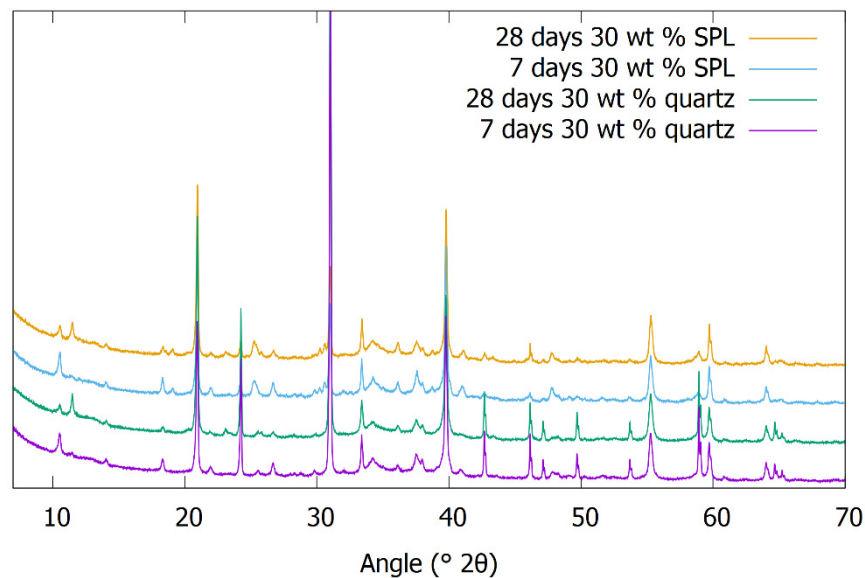

**Figure S2.** X-ray diffractograms of the samples with 30 wt % quartz filler and 30 wt % spent pot lining aluminosilicates at 7 and 28 days.
